## Correction: Incorporating a Rapid-Impact Package for Neglected Tropical Diseases with Programs for HIV/AIDS, Tuberculosis, and Malaria

Peter J. Hotez, David H. Molyneux, Alan Fenwick, Eric Ottesen, Sonia Ehrlich Sachs, Jeffrey D. Sachs

Correction for:

Hotez PJ, Molyneux DH, Fenwick A, Ottesen E, Ehrlich Sachs S, et al. (2006) Incorporating a Rapid-Impact Package for Neglected Tropical Diseases with Programs for HIV/AIDS, Tuberculosis, and Malaria. *PLoS Med* 3(5): e102. doi:10.1371/journal.pmed.0030102

In Table 1, under the column labeled "Deaths," there should be an "e" footnote for the deaths from trypanosomiasis, Chagas disease, and leprosy, not a "c" as written.

Citation: Hotez PJ, Molyneux DH, Fenwick A, Ottesen E, Ehrlich Sachs S, et al. (2007) Correction: Incorporating a Rapid-Impact Package for Neglected Tropical Diseases with Programs for HIV/AIDS, Tuberculosis, and Malaria. *PLoS Med* 4(9): e277. doi:10.1371/journal.pmed.0040277

Received: August 9, 2007; Accepted: August 9, 2009; Published: September 25, 2007.

Copyright: © 2007 Hotez et al. This is an open-access article distributed under the terms of the Creative Commons Attribution License, which permits unrestricted use, distribution, and reproduction in any medium, provided the original author and source are credited.

## Correction: The Global Threat of Counterfeit Drugs: Why Industry and Governments Must Communicate the Dangers

Robert Cockburn, Paul N. Newton, E. Kyeremateng Agyarko, Dora Akunyili, Nicholas J. White

Correction for:

Cockburn R, Newton PN, Agyarko EK, Akunyili D, White NJ (2005) The Global Threat of Counterfeit Drugs: Why Industry and Governments Must Communicate the Dangers. *PLoS Med* 2(4): e100. doi:10.1371/journal.pmed.0020100

The authors quoted a news story from the *San Francisco Examiner* [12] that states that 192,000 people died in China in 2001 as a consequence of fake drugs. This story was sourced to the *Shenzhen Evening News* of January 25, 2002. However, the authors are grateful to Professor Jin Shaohong, Executive Director-General of the National Institute for the Control of Pharmaceutical and Biological Products in Beijing, China, for pointing out that the English translation of the *Shenzhen Evening News* story used by the *San Francisco Examiner* and other newspapers is incorrect. The article does not mention counterfeit drugs, but claims that 192,000 people died of drug-induced diseases from the irrational use of drugs in 2001. As this statistic is often quoted in the literature on counterfeit pharmaceuticals, the authors wish to correct this error.

Further discussion by three of the authors of this correction is available at <http://medicine.plosjournals.org/perlserv/?request=read-response&doi=10.1371/journal.pmed.0020100#r1765>.

Citation: Cockburn R, Newton PN, Agyarko EK, Akunyili D, White NJ (2007) Correction: The Global Threat of Counterfeit Drugs: Why Industry and Governments Must Communicate the Dangers. *PLoS Med* 4(9): e289. doi:10.1371/journal.pmed.0040289

Received: August 17, 2007; Accepted: August 17, 2007; Published: September 25, 2007.

Copyright: © 2007 Cockburn et al. This is an open-access article distributed under the terms of the Creative Commons Attribution License, which permits unrestricted use, distribution, and reproduction in any medium, provided the original work is properly cited.
